# Supplementary material
Source: Springer Nature journal article supplement (https://www.springermedizin.de/resource/supplementary/13613_2012_141_MOESM1_ESM.pdf/12196260)

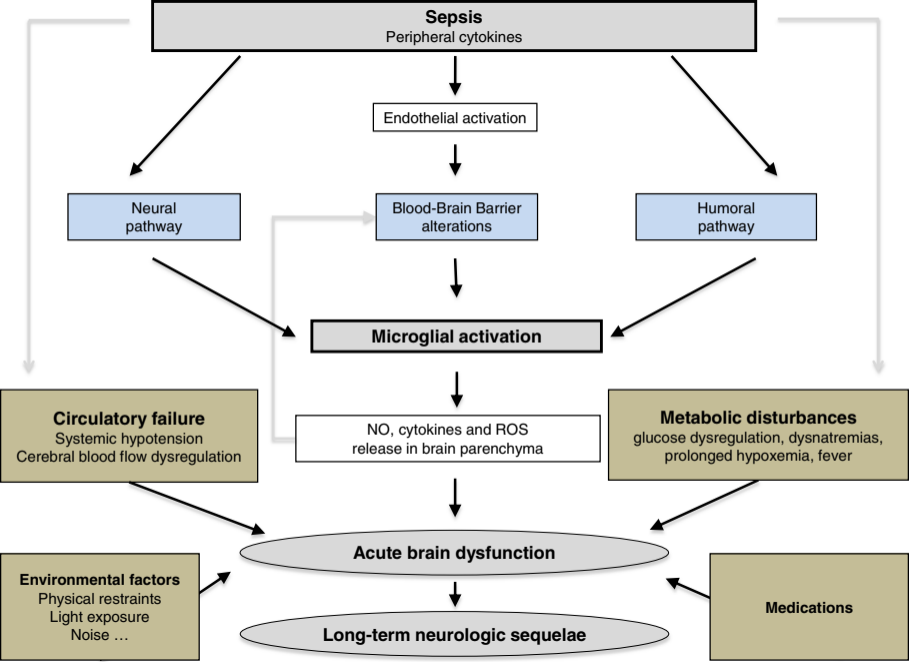

Supplement: MOESM1 [file 12196260]
